# Supplementary material for: Chlamydomonas ODA10 is a conserved axonemal protein that plays a unique role in outer dynein arm assembly
Source: PubMed Central journal article supplement — Mol Biol Cell. 2013 Dec 1;24(23):3689–96. doi: 10.1091/mbc.E13-06-0310 (PMC3842995; doi:10.1091/mbc.e13-06-0310), 2013-12-01
Supplement: supp_E13-06-0310_CombinedSupMats.pdf [file supp_E13-06-0310_CombinedSupMats.pdf]

# Supplemental Materials

*Molecular Biology of the Cell*

Dean et al.

Supplementary Table 1: Primer Information

| Primers | Sequences                                          | Annealing t° |
|---------|----------------------------------------------------|--------------|
| V3S294  | F: ACCGCGTTGCCGGAGCAGAC<br>R: AGCGTGCGGCTGGCGCTTAC | 71           |
| ODA10-6 | F: GTGGCCTTGGCGCCCATGAT<br>R: GGGCTCGGGCGATCATTCCG | 68           |

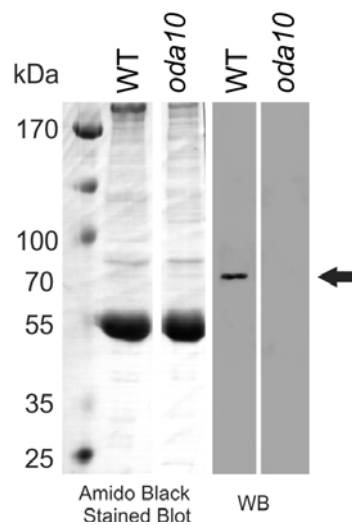

**Supplemental Figure 1:** Characterization of a rabbit polyclonal antibody to ODA10p. A western blot (right) of flagellar samples from wild type and *oda10-2* cells shows a single band of about 70kDa, only present in the wild type sample, indicating that affinity purified rabbit polyclonal anti-ODA10 antibody is specific to ODA10p (predicted molecular weight ~56kDa). Equal loading is shown by the stained blot (left).
